# Supplementary figures and images for: LncRNA TUG1 Demethylated by TET2 Promotes NLRP3 Expression, Contributes to Cerebral Ischemia/Reperfusion Inflammatory Injury
Source: PubMed Central journal article supplement — ASN Neuro. 2021 Apr 14;13:17590914211003247. doi: 10.1177/17590914211003247 (PMC8058810; doi:10.1177/17590914211003247), 2021-04-14

Supplemental Figure 1

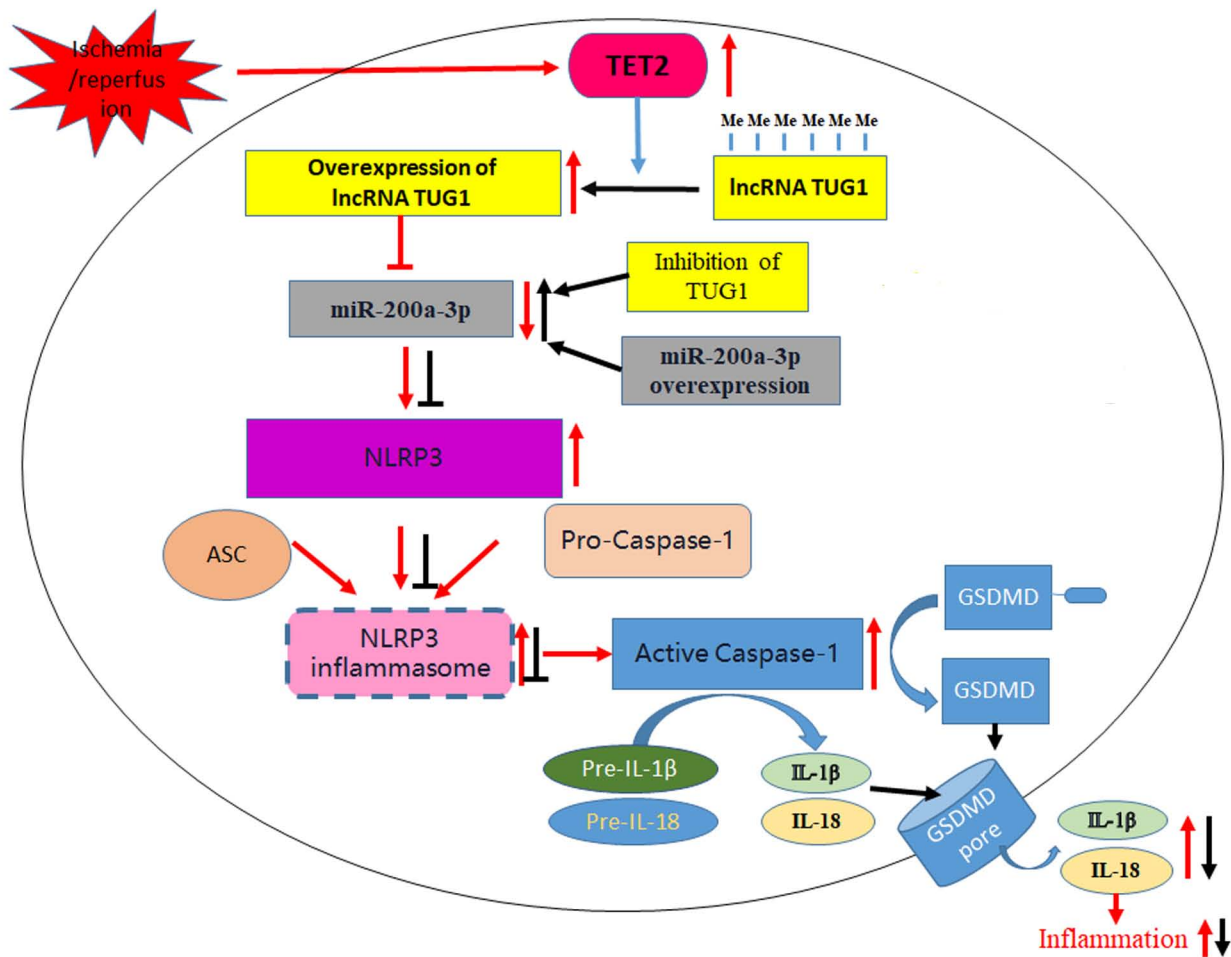

Supplement: sj-pdf-1-asn-10.1177_17590914211003247.pdf [file sj-pdf-1-asn-10.1177_17590914211003247.pdf]
